# Supplementary material
Source: ML conference proceedings conference paper supplement (https://openreview.net/forum?id=HxWEL2zQ3AK)
Supplement: supplementary_material [file attachment]

---

# Comparing Rewinding and Fine-tuning in Neural Network Pruning Reproducibility Challenge 2021

---

Anonymous Author(s)  
Affiliation  
email

## Reproduction Summary

1

### 2 **Scope of Reproducibility**

3 We are reproducing *Comparing Rewinding and Fine-tuning in Neural Networks*, by Renda et al. [2020]. In this work  
4 the authors compare three different approaches to retraining neural networks after pruning: 1) fine-tuning, 2) rewinding  
5 weights as in Frankle and Carbin [2019] and 3) a new, original method involving learning rate rewinding, building upon  
6 Frankle and Carbin [2019]. We reproduce the results of all three approaches, but we focus on verifying their approach,  
7 learning rate rewinding, since it is newly proposed and is described as a universal alternative to other methods.

8 We used CIFAR10 for most reproductions along with additional experiments on the larger CIFAR100, which extends  
9 the results originally provided by the authors. We have also extended the list of tested network architectures to include  
10 Wide ResNets (Zagoruyko and Komodakis [2016]). The new experiments led us to discover the limitations of learning  
11 rate rewinding which can worsen pruning results on large architectures.

### 12 **Methodology**

13 We implemented the code ourselves in Python with TensorFlow 2, basing our implementation of the paper alone and  
14 without consulting the source code provided by the authors. We ran two sets of experiments. In the reproduction set, we  
15 have striven to exactly reproduce the experimental conditions of Renda et al. [2020]. We have also conducted additional  
16 experiments, which use other network architectures, effectively showing results previously unreported by the authors.  
17 We did not cover all originally reported experiments – we covered as many as needed to state the validity of claims. We  
18 used Google Cloud resources and a local machine with 2x RTX 3080 GPUs.

### 19 **Results**

20 We were able to reproduce the exact results reported by the authors in all originally reported scenarios. However,  
21 extended results on larger Wide Residual Networks have demonstrated the limitations of the newly proposed learning  
22 rate rewinding – we observed a previously unreported accuracy degradation for low sparsity ranges. Nevertheless, the  
23 general conclusion of the paper still holds and was indeed reproduced.

### 24 **What was easy**

25 Re-implementation of the pruning and retraining methods was technically easy, as it is based on a popular and simple  
26 pruning criterion – magnitude pruning. Original work was descriptive enough to reproduce the results with satisfying  
27 results without consulting the code.

### 28 **What was difficult**

29 Not every design choice was mentioned in the paper, thus reproducing the exact results was rather difficult and required  
30 a meticulous choice of hyper-parameters. Experiments on ImageNet and WMT16 datasets were time consuming and  
31 required extensive resources, thus we did not verify them.

### 32 **Communication with original authors**

33 We did not consult the original authors, as there was no need to

## 34 **1 Introduction**

35 Neural network pruning is an algorithm leading to decrease the size of a network, usually by removing its connections  
36 or setting their weights to 0. This procedure generally allows obtaining smaller and more efficient models. It often turns  
37 out that these smaller networks are as accurate as their bigger counterparts or the accuracy loss is negligible. A common  
38 way to obtain such high quality sparse network is to prune it after the training has finished (Liu et al. [2019], Frankle  
39 and Carbin [2019]). Networks that have already converged are easier to prune than randomly initialized networks (Liu  
40 et al. [2019], Lee et al. [2018]). After pruning, more training is usually required to restore the lost accuracy. Although  
41 there are a few ways to retrain the network, finetuning might be the easiest and most often chosen by researchers and  
42 practitioners. (Liu et al. [2019], Renda et al. [2020]).

43 Lottery Ticket Hypothesis from Frankle and Carbin [2019] formulates a hypothesis that for every dense neural network,  
44 there exists a smaller subnetwork that matches or exceeds results of the original. The algorithm originally used to  
45 obtain examples of such networks is iterative magnitude pruning with weight rewinding, and it is one of the methods of  
46 retraining after pruning compared in this work.

## 47 **2 Scope of reproducibility**

48 Renda et al. [2020] formulated the following claims:

49 Claim 1: Widely used method of training after pruning: finetuning yields worse results than rewinding based methods  
50 (supported by figures 1, 2, 3, 4 and table 5)

51 Claim 2: Newly introduced learning rate rewinding works as good or better as weight rewinding in all scenarios  
52 (supported by figures 1, 2, 3, 4 and table 5, but not supported by figure 5)

53 Claim 3: Iterative pruning with learning rate rewinding matches state-of-the-art pruning methods  
54 (supported by figures 1, 2, 3, 4 and table 5, but not supported by figure 5)

## 55 **3 Methodology**

56 We aimed to compare three retraining approaches: 1) finetuning, 2) weight rewinding and 3) learning rate rewinding.  
57 Our general strategy that repeated across all experiments was as follows:

- 58 1. train a dense network to convergence,
- 59 2. prune the network using magnitude criterion: remove weights with smallest L1 norm,
- 60 3. retrain the network using selected retraining approach.

61 In the case of structured pruning: in step 2, we removed structures (rows or convolutional channels) with the smallest  
62 average L1 norm (Crowley et al. [2018]), rather than removing separate connections.

63 In the case of iterative pruning: the network in step 1 was not randomly initialized, but instead: weights from a model  
64 from a previous iterative pruning step were loaded as the starting point.

65 We trained all our networks using Stochastic Gradient Descent with Nesterov Momentum. The learning rate was  
66 decreased in a piecewise manner during the training, but momentum coefficient was constant and equal to 0.9.

### 67 **3.1 Model descriptions**

68 In this report, we were focusing on an image recognition task using convolutional neural networks (LeCun [1988]). For  
69 most of our experiments, we chose to use identical architectures as Renda et al. [2020] to better validate their claims  
70 and double-check their results, rather than provide additional ones. Therefore, most of the used networks are residual  
71 networks, which were originally proposed in He et al. [2016a]. Additionally, to verify the general usefulness of pruning  
72 and retraining methods proposed in Renda et al. [2020] we extend the list of tested network architectures to much larger  
73 wide residual networks from Zagoruyko and Komodakis [2016].

#### 74 **3.1.1 Residual networks (ResNet)**

75 Just as Renda et al. [2020], we chose to use the original version of ResNet as described in He et al. [2016a] rather than  
76 the more widely used, improved version (with preactivated blocks) from He et al. [2016b]. We created the models

77 ourselves, using TensorFlow (Abadi et al. [2015]) and Keras. We strove to replicate the exact architectures used by  
 78 Renda et al. [2020] and He et al. [2016a] and train them from scratch.

| Model      | Trainable parameters | Kernel parameters | CIFAR-10 | CIFAR-100 |
|------------|----------------------|-------------------|----------|-----------|
| ResNet-20  | 272 282              | 270 896           | 92.46%   | –         |
| ResNet-56  | 855 578              | 851 504           | 93.71%   | 71.90%    |
| ResNet-110 | 1 730 522            | 1 722 416         | 94.29%   | 72.21%    |

Table 1: ResNets architecture description, including baseline accuracy across datasets.

### 79 Hyper-parameters

Learning rate started with 0.1 and was multiplied by 0.1 twice, after 36 000 and 54 000 iterations. One training cycle was 72 000 iterations in total. For all batch normalization layers, we set the batch norm decay to 0.997, following Renda et al. [2020] which was also used in the original TensorFlow implementation<sup>1</sup>. We initialize network’s weights with what is known as He uniform initialization from He et al. [2015]. We regularize ResNets, during both training and finetuning, using  $L2$  penalty with  $10^{-4}$  coefficient. In other words, the loss function (from which we calculate the gradients) looks as follows:

$$FinalLoss = CategoricalCrossentropy(GroundTruth, Prediction) + 10^{-4} \times \sum_{i \in W} w_i^2$$

### 80 3.1.2 Wide Residual Networks (Wide ResNet, WRN)

81 WRN networks were introduced in Zagoruyko and Komodakis [2016]. They are networks created by simply increasing  
 82 the number of filters in preactivated ResNet networks (He et al. [2016b]).

| Model    | Trainable parameters | Kernel parameters | CIFAR-10 |
|----------|----------------------|-------------------|----------|
| WRN-16-8 | 10 961 370           | 10 954 160        | 95.72%   |

Table 2: Wide ResNet architecture description.

### 83 Hyper-parameters

As Wide ResNets are newer and much larger than ResNets, hyper-parameters are slightly different. To choose them, we follow Zagoruyko and Komodakis [2016]. Learning rate starts with 0.1 and multiplied by 0.2 thrice: after 32 000, 48 000 and 64 000 iterations. Training lasts for 80 000 iterations. For all batch normalization layers, we use hyper-parameters from the newer TensorFlow implementation<sup>2</sup> with batch norm decay set to 0.9. Following Zagoruyko and Komodakis [2016], we use larger  $L2$  penalty for this network:  $2 \times 10^{-4}$ . Finally, the loss function is as follows:

$$FinalLoss = CategoricalCrossentropy(GroundTruth, Prediction) + 2 \times 10^{-4} \times \sum_{i \in W} w_i^2$$

### 84 3.2 Datasets

85 CIFAR-10 and CIFAR-100 are image classification datasets introduced in Krizhevsky et al.. Following Renda et al.  
 86 [2020], we use all (50 000) training examples to train the model.

<sup>1</sup>[https://github.com/tensorflow/models/blob/r1.13.0/official/resnet/resnet\\_model.py](https://github.com/tensorflow/models/blob/r1.13.0/official/resnet/resnet_model.py)

<sup>2</sup>[https://github.com/tensorflow/models/blob/r2.5.0/official/vision/image\\_classification/resnet/resnet\\_model.py](https://github.com/tensorflow/models/blob/r2.5.0/official/vision/image_classification/resnet/resnet_model.py)

| Dataset   | Training examples | Validation examples | Classes | Resolution |
|-----------|-------------------|---------------------|---------|------------|
| CIFAR-10  | 50 000            | 10 000              | 10      | 32×32      |
| CIFAR-100 | 50 000            | 10 000              | 100     | 32×32      |

Table 3: CIFAR datasets description.

### 87 3.2.1 Postprocessing

88 We used a standard postprocessing for both CIFAR-10 and CIFAR-100 datasets (Renda et al. [2020], Frankle and  
89 Carbin [2019], Zagoruyko and Komodakis [2016]). During training and just before passing data to the model, we:

- 90 1. standardized the input by subtracting the mean and dividing by the std of RGB channels (calculated on training  
91 dataset),
- 92 2. randomly flipped in horizontal axis,
- 93 3. added a four pixel reflection padding,
- 94 4. randomly cropped the image to its original size.

95 During the validation, we did only the first step of the above.

### 96 3.3 Experimental setup and code

97 Our ready-to-use code, which includes experiment definitions, can be found at <https://anonymous.4open.science/r/reproducing-comparing-rewinding-and-finetuning-1C5A>. It’s written using TensorFlow  
98 (Abadi et al. [2015]) version 2.4.2 in Python. More details are included in the repository.  
99

### 100 3.4 Computational requirements

101 Recreating the experiments required a modern GPU, training all models on CPU was virtually impossible. Training  
102 time varies depending on a lot of factors: network version and size, exact version of the deep learning library, and even  
103 the operating system. In our case, using TensorFlow 2.4.2 on Ubuntu and a single RTX 3080 GPU, the smallest of the  
104 used models, ResNet-20, takes about 20 minutes to train on CIFAR-10 dataset. To replicate our experiments, training at  
105 least a single baseline network and then, separately, a single pruned network, is required. To reduce computational  
106 requirements, we reused one dense baseline for multiple compression ratios. Approximated training time requirements  
107 can be seen in the table below.

| Model      | Dataset  | Number of iterations | Iterations per second | Time for training cycle |
|------------|----------|----------------------|-----------------------|-------------------------|
| ResNet-20  | CIFAR-10 | 72 000               | 59.0                  | 22 min                  |
| ResNet-56  | CIFAR-10 | 72 000               | 28.6                  | 43 min                  |
| ResNet-110 | CIFAR-10 | 72 000               | 15.9                  | 77 min                  |
| WRN-16-8   | CIFAR-10 | 80 000               | 17.4                  | 78 min                  |

Table 4: Time requirements for replicating or running experiments from this report. Reported times are obtained using a single RTX 3080 GPU in Linux environment, using TensorFlow in version 2.4.2.

108 For all our experiments in total, we used around 536 GPU hours.

## 109 4 Method description

110 We compare three methods of retraining after pruning. For all of them, the starting point is a network that was already  
111 trained to convergence, then pruned to a desired sparsity. The difference between the three retraining methods is what  
112 follows after it.

113 **4.1 Fine-tuning**

114 Fine-tuning is retraining with a small, constant learning rate – in our case, whenever fine-tuning was used, the learning  
115 rate was set to 0.001 as in Renda et al. [2020]. We finetune the network for the same number of iterations as the baseline  
116 – 72 000 iterations in the case of the original ResNet architecture. In this method, such long retraining would not be  
117 necessary in practical applications, since the network converges much faster.

118 **4.2 Weight rewinding**

119 Weight rewinding restores the network’s weights from a previous point (possibly beginning) in the training history and  
120 then continues training from this point using the original training schedule – in our case a piecewise constant decaying  
121 learning rate schedule. When rewinding a network to iteration  $K$  that originally trained for  $N$  iterations: first prune  
122 the dense network that was trained for  $N$  iterations. Then, for connections that survived, restore their values to  $K$ -th  
123 iteration from the training history. Then train to the convergence for the remaining  $N - K$  iterations.

124 **4.3 Learning rate rewinding**

125 Learning rate rewinding continues training with weights that have already converged, but restores the learning rate  
126 schedule to the beginning, just as if we were training from scratch, and then trains to the convergence once again. This  
127 reminds the cyclical learning rates from Smith [2017]. Learning rate rewinding really is weight rewinding for  $K = N$ ,  
128 but the final retraining is always for  $N$  iterations.

129 **5 Results**

130 In most of our experiment, just as Renda et al. [2020], we investigate how does the trade-off between prediction accuracy  
131 and compression ratio look like. In one of the experiments (table 5) we verify only one compression ratio, but for the  
132 rest, we verify multiple. We report a median result out of 2 up to 12 trials for each compression ratio. To better utilize  
133 our compute capabilities, we decided to spend more training cycles in situations where there is no clear winner between  
134 the compared methods. On each plot, we include error bars showing 80% confidence intervals.

135 **5.1 Results reproducing original paper**

136 In this section, we include experiments that we successfully reproduced. They match the original ones within 1% error  
137 margin.

138 Across all scenarios where finetuning was tested, it was by far the worst of the three methods, which directly supports  
139 claim 1 (section 2). Weight rewinding and learning rate rewinding most often are equally matched, but in some cases  
140 learning rate rewinding works a little better.

141 **ResNets on CIFAR-10 dataset**

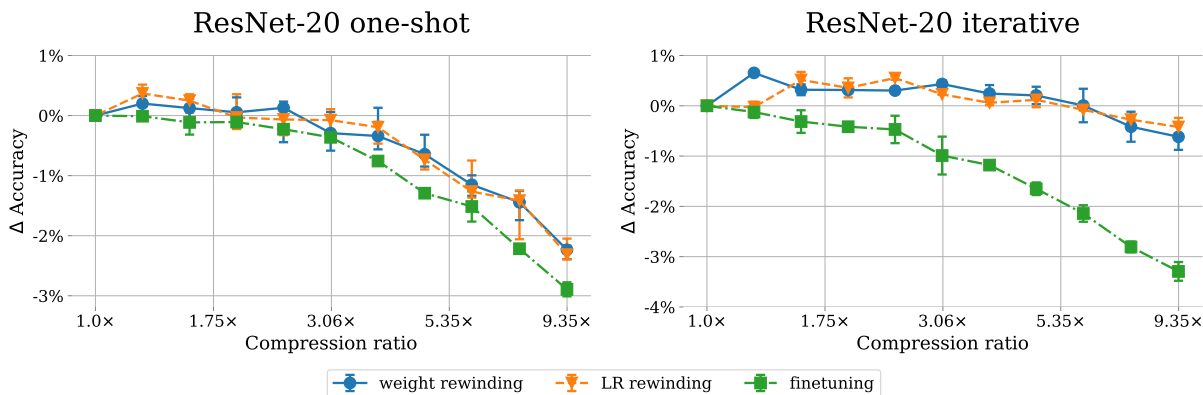

Figure 1: Results of ResNet-20 (table 1) on CIFAR-10 (table 3) with unstructured, magnitude pruning in versions: one-shot and iterative. Results show varying compression ratios. Maximal compression ratio ( $9.35\times$ ) means that there are only 29 000 non-zero kernel parameters left. This experiment supports claims 1, 2, 3 (section 2).

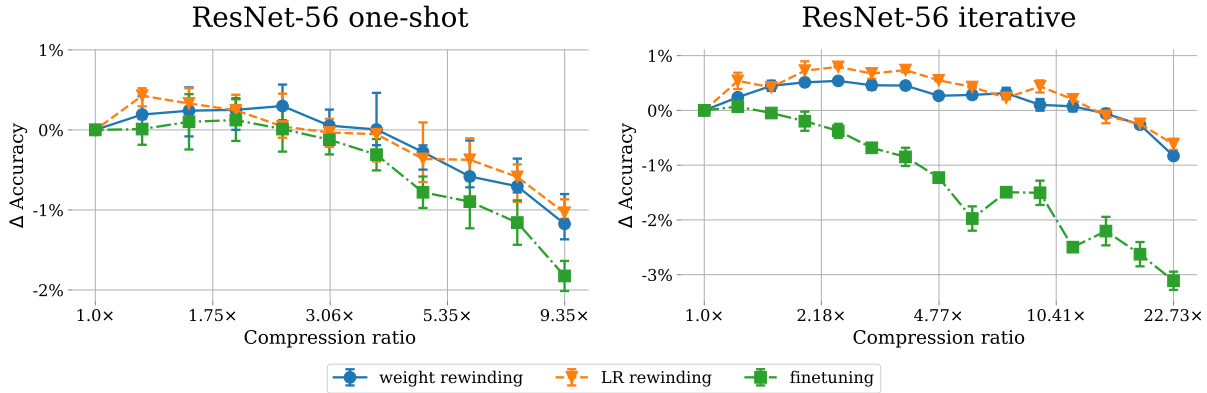

Figure 2: Results of ResNet-56 (table 1) on CIFAR-10 (table 3) with unstructured, magnitude pruning in versions: one-shot and iterative. Results with varying compression ratios. Maximal compression ratio means ( $22.73\times$ ) that there are only 37 600 non-zero kernel parameters left. This experiment supports claims 1, 2, 3 (section 2).

| Network    | Dataset  | Retraining       | Sparsity | Test Accuracy |
|------------|----------|------------------|----------|---------------|
| ResNet-110 | CIFAR-10 | None             | 0%       | 94.29%        |
| ResNet-110 | CIFAR-10 | LR rewinding     | 89.3%    | 93.74%        |
| ResNet-110 | CIFAR-10 | weight rewinding | 89.3%    | 93.73%        |
| ResNet-110 | CIFAR-10 | finetuning       | 89.3%    | 93.32%        |

Table 5: Results of ResNet-110 (table 1) trained on CIFAR-10 (table 3) with unstructured, one-shot magnitude pruning. Sparsity 89.3% corresponds to  $9.35\times$  compression ratio. This experiment supports claims 1, 2, 3 (section 2).

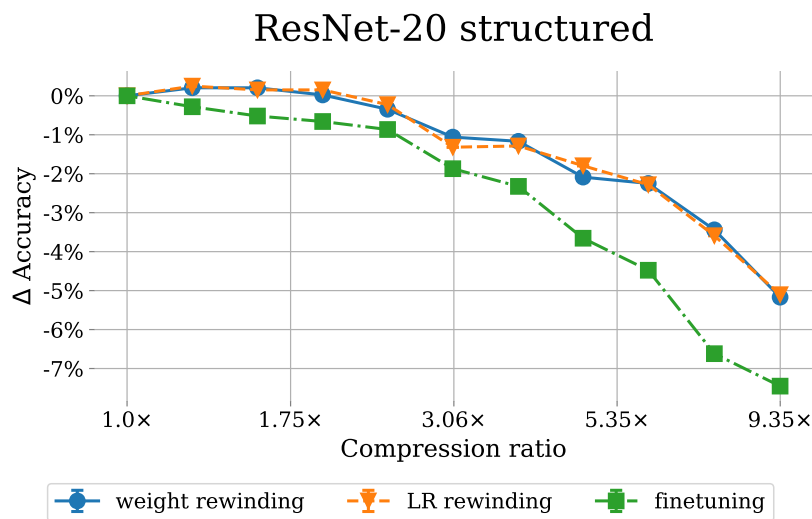

Figure 3: Results of ResNet-20 (table 1) on CIFAR-10 (table 3) with structured, one-shot, magnitude pruning. Results show varying compression ratios. Maximal compression ratio ( $9.35\times$ ) means that there are only 29 000 non-zero kernel parameters left in ResNet-20.

142 **5.2 Results beyond original paper**

143 **ResNets on CIFAR-100 dataset**

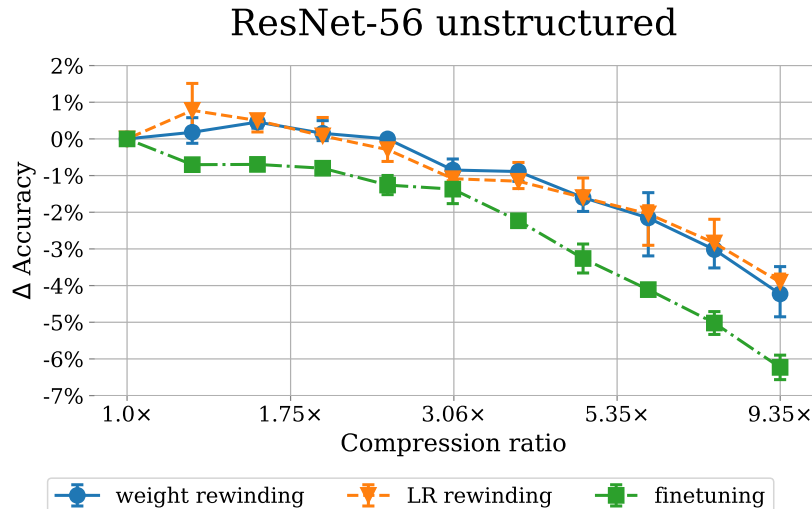

Figure 4: Results of ResNet-56 (table 1) on CIFAR-100 (table 3) with unstructured, one-shot, magnitude pruning. Results with varying compression ratios. Maximal compression ratio (9.35x) means that there are only 91 500 non-zero kernel parameters left. This experiment supports claims 1, 2, 3 (section 2) even though this scenario wasn't originally tested in Renda et al. [2020].

144 **WRN-16-8 on CIFAR-10 dataset**

145 WRN-16-8 shows consistent behaviour – accuracy in the low sparsity regime is reduced in comparison to the baseline.  
 146 In the case of iterative pruning, where each step is another pruning in the low sparsity regime, it leads to a large  
 147 difference between the two retraining methods. Since for WRN-16-8 one-shot, low sparsity pruning shows a small  
 148 regression in comparison to the baseline, this regression accumulates when pruning multiple times, as we do in iterative  
 149 pruning. This can be seen in figure 5.

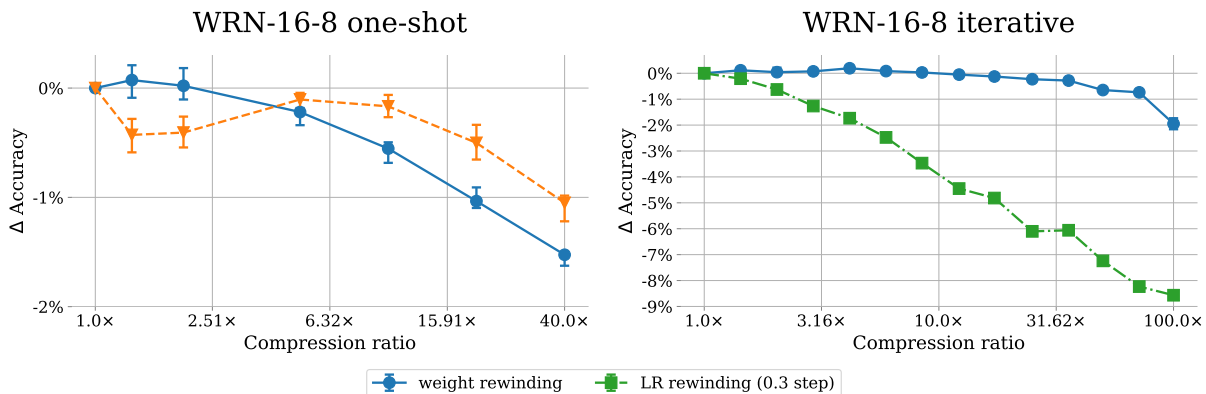

Figure 5: Results of WRN-16-8 (table 2) on CIFAR-10 (table 3) with unstructured, magnitude pruning in versions: one-shot and iterative. Results with varying compression ratios. Maximal compression ratio (100x) leaves 109 500 non-zero kernel parameters while achieving around 94% accuracy or around 95% when leaving 153 400 non-zero parameters. One can see catastrophic effects of low-sparsity pruning when using learning rate rewinding procedure.

150 For iterative pruning (figures 1, 2) we used a nonstandard step size of 30% per iterative pruning iteration, which was  
 151 a way to reduce the computational requirements. We provide a comparison of our step size to the more commonly  
 152 used 20%. We show that there is virtually no difference between both versions and the aforementioned catastrophic  
 153 degradation occurs in both cases, as long as the step size is in the low sparsity regime.

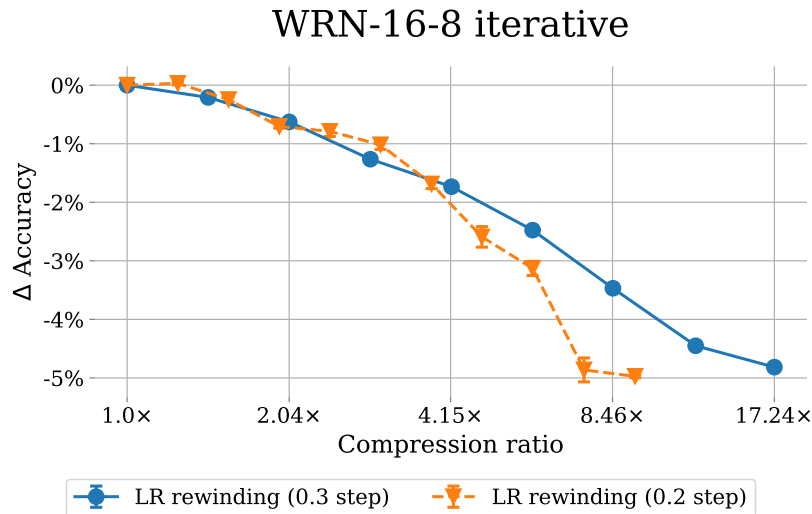

Figure 6: Results of WRN-16-8 (table 2) on CIFAR-10 (table 3) with unstructured, iterative, magnitude pruning with two different step sizes. Results show varying compression ratios and accuracy.

## 154 6 Discussion

155 We were able to confirm the general conclusion of Renda et al. [2020]. Fine-tuning can mostly be replaced by other  
 156 retraining techniques, e.g., by weight rewinding as done by Frankle and Carbin [2019]. However, we have also shown  
 157 in figure 5 that the newly proposed learning rate rewinding was a poor choice when we were pruning larger networks –  
 158 in our case that was WRN-16-8. We believe this should be further examined as there might exist a simple workaround  
 159 to this problem – a retraining procedure in between weight rewinding and learning rate rewinding which would work in  
 160 all cases. Furthermore, it would be interesting to see where exactly learning rate rewinding starts losing accuracy in  
 161 comparison to weight rewinding and why this catastrophic accuracy degradation occurs. Perhaps, the reason for it not  
 162 occurring with the original ResNet architecture is the degree to which the larger networks overtrain – larger networks  
 163 tend to overtrain more. Such an overtrained network might not be a good starting point for the retraining.

## 164 Acknowledgements

165 The authors thank Polish National Science Center for funding under the OPUS-18 2019/35/B/ST6/04379 grant and the  
 166 PIGrid consortium for computational resources.

## 167 References

- 168 Alex Renda, Jonathan Frankle, and Michael Carbin. Comparing Rewinding and Fine-tuning in Neural Network Pruning.  
 169 2020. URL <http://arxiv.org/abs/2003.02389>. arXiv: 2003.02389.
- 170 Jonathan Frankle and Michael Carbin. The lottery ticket hypothesis: Finding sparse, trainable neural networks. *7th*  
 171 *International Conference on Learning Representations, ICLR 2019*, page 1–42, 2019. arXiv: 1803.03635 Citation  
 172 Key: Frankle2019.
- 173 Sergey Zagoruyko and Nikos Komodakis. Wide residual networks. In Edwin R. Hancock Richard C. Wilson and William  
 174 A. P. Smith, editors, *Proceedings of the British Machine Vision Conference (BMVC)*, pages 87.1–87.12. BMVA Press,  
 175 September 2016. ISBN 1-901725-59-6. doi: 10.5244/C.30.87. URL <https://dx.doi.org/10.5244/C.30.87>.



- 176 Zhuang Liu, Mingjie Sun, Tinghui Zhou, Gao Huang, and Trevor Darrell. Rethinking the value of network pruning. *7th*  
177 *International Conference on Learning Representations, ICLR 2019*, page 1–21, 2019. arXiv: 1810.05270 Citation  
178 Key: Liu2019a.
- 179 Namhoon Lee, Thalaiyasingam Ajanthan, and Philip H. S. Torr. SNIP: single-shot network pruning based on connection  
180 sensitivity. *CoRR*, abs/1810.02340, 2018. URL <http://arxiv.org/abs/1810.02340>.
- 181 Elliot J. Crowley, Jack Turner, Amos Storkey, and Michael O’Boyle. A closer look at structured pruning for neural  
182 network compression. 10:1–12, 2018. URL <http://arxiv.org/abs/1810.04622>. arXiv: 1810.04622 Citation  
183 Key: Crowley2018.
- 184 Yann LeCun. Handwritten Digit Recognition with a Back-Propagation Network. In *Neural Information Processing*  
185 *Systems*. American Institute of Physics, 1988. URL [https://proceedings.neurips.cc/paper/1987/file/  
186 a684ecee76fc522773286a895bc8436-Paper.pdf](https://proceedings.neurips.cc/paper/1987/file/a684ecee76fc522773286a895bc8436-Paper.pdf).
- 187 Kaiming He, Xiangyu Zhang, Shaoqing Ren, and Jian Sun. Deep residual learning for image recognition. *Proceedings*  
188 *of the IEEE Computer Society Conference on Computer Vision and Pattern Recognition*, 2016-Decem:770–778,  
189 2016a. doi: 10.1109/CVPR.2016.90. arXiv: 1512.03385 Citation Key: He2016 ISBN: 9781467388504.
- 190 Kaiming He, Xiangyu Zhang, Shaoqing Ren, and Jian Sun. Identity mappings in deep residual networks. *Lecture Notes*  
191 *in Computer Science (including subseries Lecture Notes in Artificial Intelligence and Lecture Notes in Bioinformatics)*,  
192 9908 LNCS:630–645, 2016b. ISSN 16113349. doi: 10.1007/978-3-319-46493-0\_38. arXiv: 1603.05027 ISBN:  
193 9783319464923.
- 194 Martín Abadi, Ashish Agarwal, Paul Barham, Eugene Brevdo, Zhifeng Chen, Craig Citro, Greg S. Corrado, Andy  
195 Davis, Jeffrey Dean, Matthieu Devin, Sanjay Ghemawat, Ian Goodfellow, Andrew Harp, Geoffrey Irving, Michael  
196 Isard, Yangqing Jia, Rafal Jozefowicz, Lukasz Kaiser, Manjunath Kudlur, Josh Levenberg, Dandelion Mané, Rajat  
197 Monga, Sherry Moore, Derek Murray, Chris Olah, Mike Schuster, Jonathon Shlens, Benoit Steiner, Ilya Sutskever,  
198 Kunal Talwar, Paul Tucker, Vincent Vanhoucke, Vijay Vasudevan, Fernanda Viégas, Oriol Vinyals, Pete Warden,  
199 Martin Wattenberg, Martin Wicke, Yuan Yu, and Xiaoqiang Zheng. TensorFlow: Large-scale machine learning on  
200 heterogeneous systems, 2015. URL <https://www.tensorflow.org/>. Software available from tensorflow.org.
- 201 Kaiming He, Xiangyu Zhang, Shaoqing Ren, and Jian Sun. Delving deep into rectifiers: Surpassing human-level  
202 performance on imagenet classification. In *Proceedings of the IEEE International Conference on Computer Vision*  
203 *(ICCV)*, December 2015.
- 204 Alex Krizhevsky, Vinod Nair, and Geoffrey Hinton. Cifar-10 (canadian institute for advanced research). URL  
205 <http://www.cs.toronto.edu/~kriz/cifar.html>.
- 206 Leslie N. Smith. Cyclical learning rates for training neural networks, 2017.
